# Supplementary material
Source: PubMed Central journal article supplement (PMC7364821)
Supplement: NIHMS1606533-supplement-Supplemental_Methods__Legends.pdf [file NIHMS1606533-supplement-Supplemental_Methods__Legends.pdf]

## 1 **SUPPLEMENTAL INFORMATION**

### 2 **Materials and Methods**

#### 3 **Patient and cord blood samples**

4 CML samples were obtained from newly diagnosed, TKI-naïve chronic phase CML patients  
5 (n=12). Healthy cord blood samples (n = 8) were purchased from St. Louis Cord Blood Bank (St.  
6 Louis, MO). Mononuclear cells (MNCs) from CML or cord blood samples were separated by  
7 density gradient centrifugation on Ficoll-Hypaque (Nycomed, Zürich, Switzerland). CD34<sup>+</sup> cells  
8 isolated from MNCs using an autoMACS system (Miltenyi Biotec, San Diego, CA) were assessed  
9 for purity >90% with a Guava easyCyte HT Flow Cytometer (Millipore, Billerica, MA). Informed  
10 consent was obtained from all sample donors in accordance with the Declaration of Helsinki, and  
11 the studies were approved by the University of Utah Institutional Review Board. Baseline  
12 characteristics of CML patients are summarized in [Supplemental Table S1](#).

#### 13 **Cell preparation and fluorescence-activated cell sorting**

14 Cryopreserved CD34<sup>+</sup> cells from CML patients or fresh CD34<sup>+</sup> cord blood cells were cultured  
15 overnight in Iscove's Modified Dulbecco's Medium (IMDM) supplemented with 10% BIT 9500  
16 (StemCell Technologies) supplemented with cytokines (StemSpan™ CC100 containing rhFlt3L,  
17 rhSCF, rhIL-3 and rhIL-6; StemCell Technologies) at 37°C prior to experiments. CD34<sup>+</sup> cells were  
18 simultaneously stained with anti-CD38-allophycocyanin (APC) (Clone HIT2; Thermo Fisher  
19 Scientific, Waltham, MA) and anti-CD34-fluorescein isothiocyanate (FITC) (Clone 4H11; Thermo  
20 Fisher Scientific) antibodies. Cells were sorted on BD FACSAria II (BD Biosciences, San Jose,  
21 CA) into CD34<sup>+</sup>CD38<sup>-</sup> cells (enriched for stem cells) and CD34<sup>+</sup>CD38<sup>+</sup> progenitor cells.

#### 22 **Pharmacologic inhibitors**

23 Imatinib was a gift of Novartis. Karyopharm Therapeutics provided selinexor (KPT-330).

#### 24 **Clonogenic assays**

25 CD34<sup>+</sup> cells were cultured overnight with cytokines followed by sorting into CD34<sup>+</sup>38<sup>+</sup> and  
26 CD34<sup>+</sup>38<sup>-</sup> cell populations and plated at 2.2 x 10<sup>3</sup> cells/mL in Methocult H4230 (StemCell  
27 Technologies) with cytokines ± 50 nM selinexor, 2.5 μM imatinib, or combination of both. The  
28 selinexor concentration was selected based on our previous report that showed minimal toxicity  
29 against normal CD34<sup>+</sup> cells at this concentration (1). Colony forming unit granulocyte-macrophage  
30 (CFU-GM) colonies were counted after 14 days. Colony counts are summarized in [Supplemental](#)  
31 [Table S3](#).

### 32 **Apoptosis assays**

33 CD34<sup>+</sup>38<sup>+</sup> or CD34<sup>+</sup>38<sup>-</sup> cells from CML patients (n=3) or CB (n=3) were cultured for 72 hours ±  
34 selinexor and/or imatinib at the indicated concentrations. Apoptosis was measured by annexin V-  
35 APC and 7-aminoactinomycin D (BD Biosciences, San Jose, CA) on a BD LSRFortessa. Data  
36 analysis was performed using FlowJo software (Tree Star, Ashland, OR).

### 37 **Long term culture-initiating cell (LTC-IC) assays**

38 LTC-IC assays were performed as described (2, 3). Briefly, 1x10<sup>4</sup> viable CD34<sup>+</sup> cells from CML  
39 patients (n=6) were cultured ± selinexor (50 nM) and/or imatinib (2.5 μM) for 72 hours, followed  
40 by plating in MyeloCult H5100 (Stem Cell Technologies), using irradiated (80Gy) M2-10B4 cells  
41 as feeder layers. Following 5-6 weeks of culture with weekly half medium changes, cells were  
42 trypsinized and plated in clonogenic assays in Methocult H4435 Enriched (Stem Cell  
43 Technologies). CFU-GM colonies were scored and harvested after 14-18 days, and genotyped  
44 for BCR-ABL1 by fluorescence in situ hybridization (FISH) with Vysis LS1 BCR/ABL Dual Color  
45 Dual Fusion probes according to the manufacturer's instructions (Abbott Molecular Inc., Des  
46 Plaines, IL). LTC-IC colony counts are summarized in [Supplemental Table S3](#).

### 47 **Patient-derived xenografts**

48 For the first PDX experiment, viable  $1 \times 10^7$  CML CD34<sup>+</sup> cells were cultured in the absence or  
49 presence of selinexor (50 nM) and/or imatinib (2.5  $\mu$ M) for 72 hours. Cultured cells from each  
50 indicated treatment were transplanted via tail vein injections into 10-week-old sub-lethally  
51 irradiated (2Gy) female NOD.Cg-Prkdc<sup>scid</sup>Il2rg<sup>tm1Wjl</sup>/SzJ (NSG) mice (The Jackson Laboratory) (5  
52 mice per treatment arm). The mice were sacrificed at 12 weeks and assessed for human  
53 engraftment in the bone marrow by immunophenotyping using anti-mouse CD45-FITC (Clone 30-  
54 F11, Tonbo Biosciences, San Diego, CA) and anti-human CD45-APC (Clone HI30, Tonbo  
55 Biosciences). FACS-sorted human CD45<sup>+</sup> cells were genotyped for *BCR-ABL1* by FISH, as  
56 above. The second, third, and fourth PDX experiments were performed with  $1.1 \times 10^7$ ,  $3.78 \times 10^6$ ,  
57  $4 \times 10^6$  CD34<sup>+</sup> cells from different CML patients, as described above. Body weights of mice and  
58 splenic weights at the time of harvest from the four PDX experiments are summarized in  
59 [Supplemental Figure S2](#). In PDX 1, one mouse in the imatinib group and two mice in the  
60 combination group died of unknown causes between weeks 2 and 3. In PDX 2 and 3, no mice  
61 died, and in PDX 4, one selinexor mouse and all five imatinib mice died by week 4. All dead mice  
62 were excluded from further analysis. In PDX 3, one untreated and one combination mouse, did  
63 not yield sufficient human cells for scoring by FISH.

#### 64 **Meta-analysis of CML microarray data and prediction of CRM1 cargo proteins**

65 Gene expression information of primitive CD34<sup>+</sup>CD38<sup>-</sup> stem cells or quiescent (G0) cells in CML  
66 vs normal hematopoiesis were available in 5 published microarray datasets from Stemformatics  
67 (<https://www.stemformatics.org>) (4-8). Each probe was mapped to a gene, and multiple probes  
68 for each gene in each dataset were sorted for statistical significance according to t-tests with the  
69 Satterthwaite and unequal variance assumptions. Differentially expressed genes between CML  
70 and normal stem cells were ranked and identified as candidate genes if concordant  $\geq 2$ -fold  
71 changes or  $\leq 2$ -fold changes in gene expression were observed in at least 3 out of 5 datasets,  
72 each with  $p < 0.05$ . Visual representation of the intersections of differentially expressed genes

73 identified in the various datasets were made with the UpSet (9) module of the Intervene (10) Shiny  
74 App web application, with the first portion of the last name of the first author listed for each study  
75 (references 4-8). Proteins encoded by these candidate genes were cross-referenced against  
76 putative CRM1 cargos for the presence of nuclear export signals (NES) predicted by the LocNES  
77 online tool (11). The top scoring up- or down-regulated candidate genes/potential CRM1 cargo  
78 proteins in CML stem cells are summarized in [Supplemental Table S2](#).

79 To determine whether genes with putative NES were enriched within the genes with differential  
80 expression between LSCs and HSCs, we performed a genome-wide benchmark of the LocNES  
81 tool for randomly selected 100 RefSeq genes and also for genes with high expression in HSCs  
82 without regard for LSC expression. This was done by identifying genes whose highest expressed  
83 probe was in the 95th percentile of expression or higher in at least three of the five studies. This  
84 identified 619 genes, and from these we randomly chose 100 genes for an additional comparison  
85 of LocNES calling. Of note, these latter genes were generally also highly expressed in LSCs. We  
86 utilized the LocNES recommended cut-off of 0.1 for assessing NES on each of the genes,  
87 comparing the overall frequencies of NES being called in each gene set by Fisher's Exact test.

88

## 89 **Supplemental Figures**

90 Figure S1. Example annexin v plots from patient samples P02 and P03; to go with Figure 1C.

91

92 Figure S2. Body weights of mice and splenic weights at the time of harvest from the four PDX  
93 experiments. Sub-lethally irradiated female NOD scid gamma (NSG) mice (5 mice per treatment  
94 arm) injected with CD34<sup>+</sup> cells from four different CML patients were treated ex vivo with each  
95 single inhibitor or the combination for 72 hours. At 12 weeks, mice were sacrificed and assessed  
96 for engraftment. Mice were weighed periodically (A; averages shown) and spleen weight  
97 assessed at time of harvest (B). In the fourth PDX, mice transplanted with imatinib-treated cells

98 died between days 28 and 30 of an unknown cause; autopsy failed to reveal abnormalities and  
99 the %*Ph*<sup>+</sup> cells are shown in panel (C).

100 \* indicates  $p < 0.05$  when compared to the untreated group.

101 **Supplemental Tables**

102

103 **Table S1. Baseline clinical characteristics of CML patients (sample donors) in the study.**

104 **Table S2. CFU-GM colony counts from clonogenic assays and LTC-IC assays.**

105 **Table S3. Top scoring differentially expressed genes in LSCs and their putative nuclear**  
106 **export signals (from meta-analysis of published CML microarray datasets)**

107 **Table S4. 100 random genes in the genome and their putative nuclear export signals**

108 **Table S5. 100 random genes highly expressed in both HSCs and LSCs and their putative**  
109 **nuclear export signals**

110 **References**

- 111 1. Khorashad JS, Eiring AM, Mason CC, Gantz KC, Bowler AD, Redwine HM, et al. shRNA  
112 library screening identifies nucleocytoplasmic transport as a mediator of BCR-ABL1 kinase-  
113 independent resistance. *Blood*. 2015;125(11):1772-81.
- 114 2. Graham SM, Jorgensen HG, Allan E, Pearson C, Alcorn MJ, Richmond L, et al. Primitive,  
115 quiescent, Philadelphia-positive stem cells from patients with chronic myeloid leukemia are  
116 insensitive to STI571 in vitro. *Blood*. 2002;99(1):319-25.
- 117 3. Holyoake T, Jiang X, Eaves C, Eaves A. Isolation of a highly quiescent subpopulation of  
118 primitive leukemic cells in chronic myeloid leukemia. *Blood*. 1999;94(6):2056-64.
- 119 4. Affer M, Dao S, Liu C, Olshen AB, Mo Q, Viale A, et al. Gene Expression Differences  
120 between Enriched Normal and Chronic Myelogenous Leukemia Quiescent Stem/Progenitor Cells  
121 and Correlations with Biological Abnormalities. *J Oncol*. 2011;2011:798592.
- 122 5. Gerber JM, Gucwa JL, Esopi D, Gurel M, Haffner MC, Vala M, et al. Genome-wide  
123 comparison of the transcriptomes of highly enriched normal and chronic myeloid leukemia stem  
124 and progenitor cell populations. *Oncotarget*. 2013;4(5):715-28.
- 125 6. Graham SM, Vass JK, Holyoake TL, Graham GJ. Transcriptional analysis of quiescent  
126 and proliferating CD34+ human hemopoietic cells from normal and chronic myeloid leukemia  
127 sources. *Stem Cells*. 2007;25(12):3111-20.
- 128 7. Cramer-Morales K, Nieborowska-Skorska M, Scheibner K, Padget M, Irvine DA, Sliwinski  
129 T, et al. Personalized synthetic lethality induced by targeting RAD52 in leukemias identified by  
130 gene mutation and expression profile. *Blood*. 2013;122(7):1293-304.
- 131 8. Scott MT, Korfi K, Saffrey P, Hopcroft LE, Kinstrie R, Pellicano F, et al. Epigenetic  
132 Reprogramming Sensitizes CML Stem Cells to Combined EZH2 and Tyrosine Kinase Inhibition.  
133 *Cancer Discov*. 2016;6(11):1248-57.
- 134 9. Lex A, Gehlenborg N, Strobel H, Vuillemot R, Pfister H. UpSet: Visualization of  
135 Intersecting Sets. *IEEE Trans Vis Comput Graph*. 2014;20(12):1983-92.
- 136 10. Khan A, Mathelier A. Intervene: a tool for intersection and visualization of multiple gene or  
137 genomic region sets. *BMC Bioinformatics*. 2017;18(1):287.
- 138 11. Xu D, Marquis K, Pei J, Fu SC, Cagatay T, Grishin NV, et al. LocNES: a computational  
139 tool for locating classical NESs in CRM1 cargo proteins. *Bioinformatics*. 2015;31(9):1357-65.

140
